# Supplementary material for: Controllable Chiral Lattices for 2D ROA Mapping and a Long-term Stable Broadband CPL Detector
Source: Research Square preprint supplement (doi:10.21203/rs.3.rs-3675568/v1), 2024-04-19
Supplement: Supplementary file 1 [file cc300685b5af8ea6de4070b1.docx]

**Controllable Chiral Lattices for 2D ROA Mapping and
a Long-term Stable Broadband CPL Detector**

Junyoung Kwon1, Jae Bum Jeon1, Won Jin Choi2, Uichang Jeong1, Wookjin Jung1, Kyung Min Kim1, Jihyeon Yeom1*

1Department of Materials Science and Engineering, Korea Advanced Institute of Science and Technology (KAIST), Daejeon 34141, Republic of Korea

2Physical and Life Sciences, Lawrence Livermore National Laboratory, Livermore, California 94550, United States

**
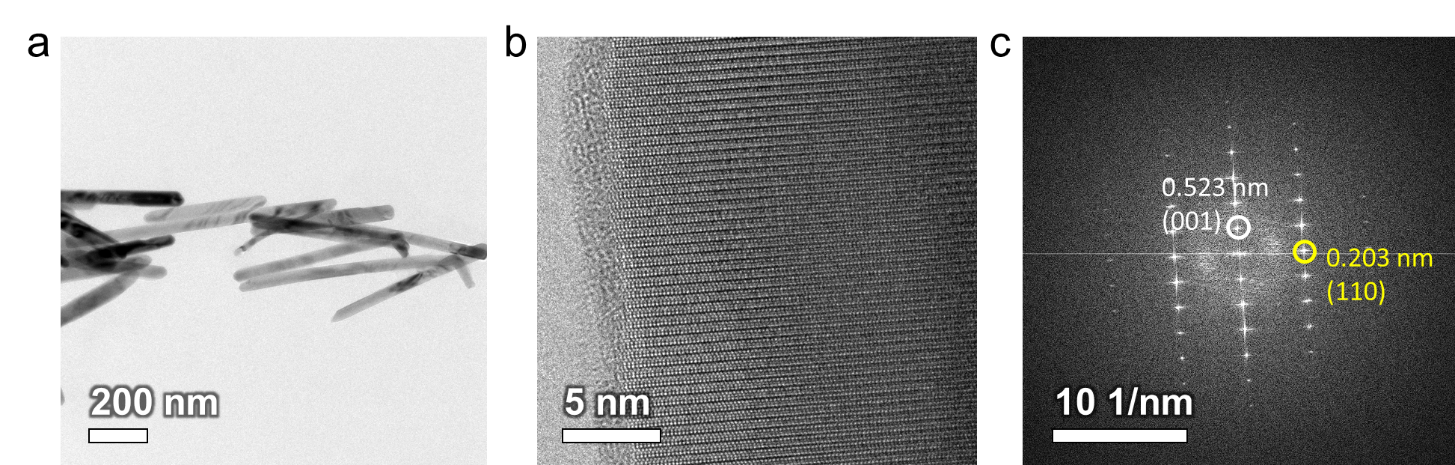
**

**Supplementary Figure 1. TEM images of *L*-Cys-Se NRs. (a) TEM image, (b) HR-TEM lattice fringe image, (c) FFT image calculated from (b) showing 0.523 nm and 0.203 nm spacings with trigonal Se projected along [1 -1 0].**

**
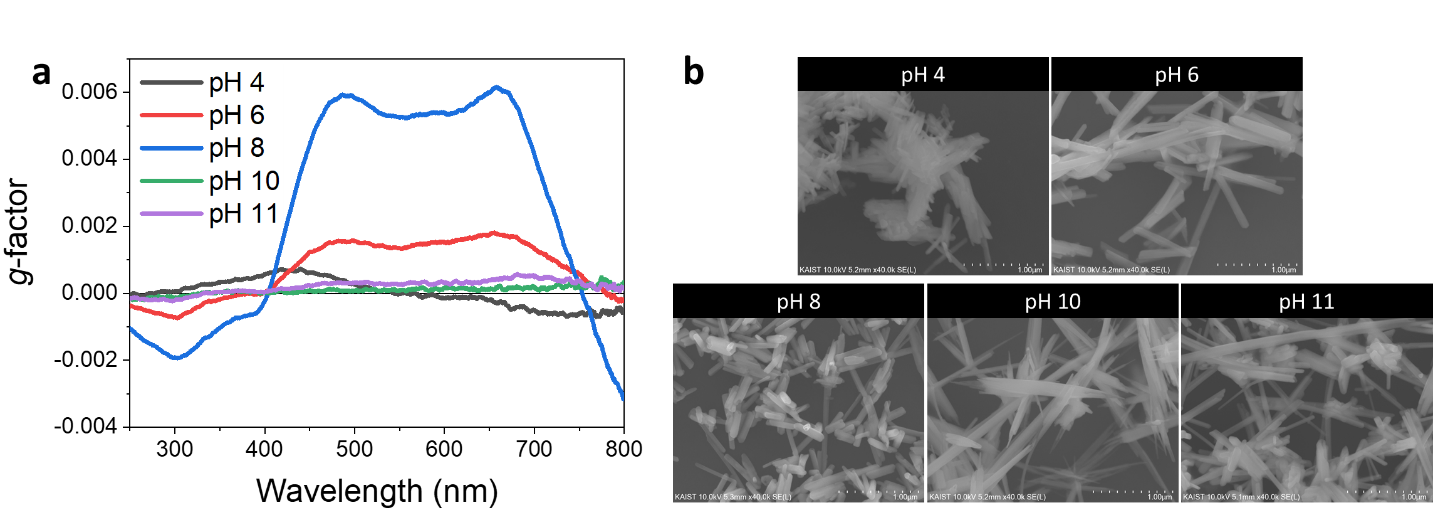
**

**Supplementary Figure 2. pH effect on *g*-factor and morphology of Se nanorods (NRs).** (a) *g*-factor spectra and (b) SEM images of Se NRs at different reaction pH.

**
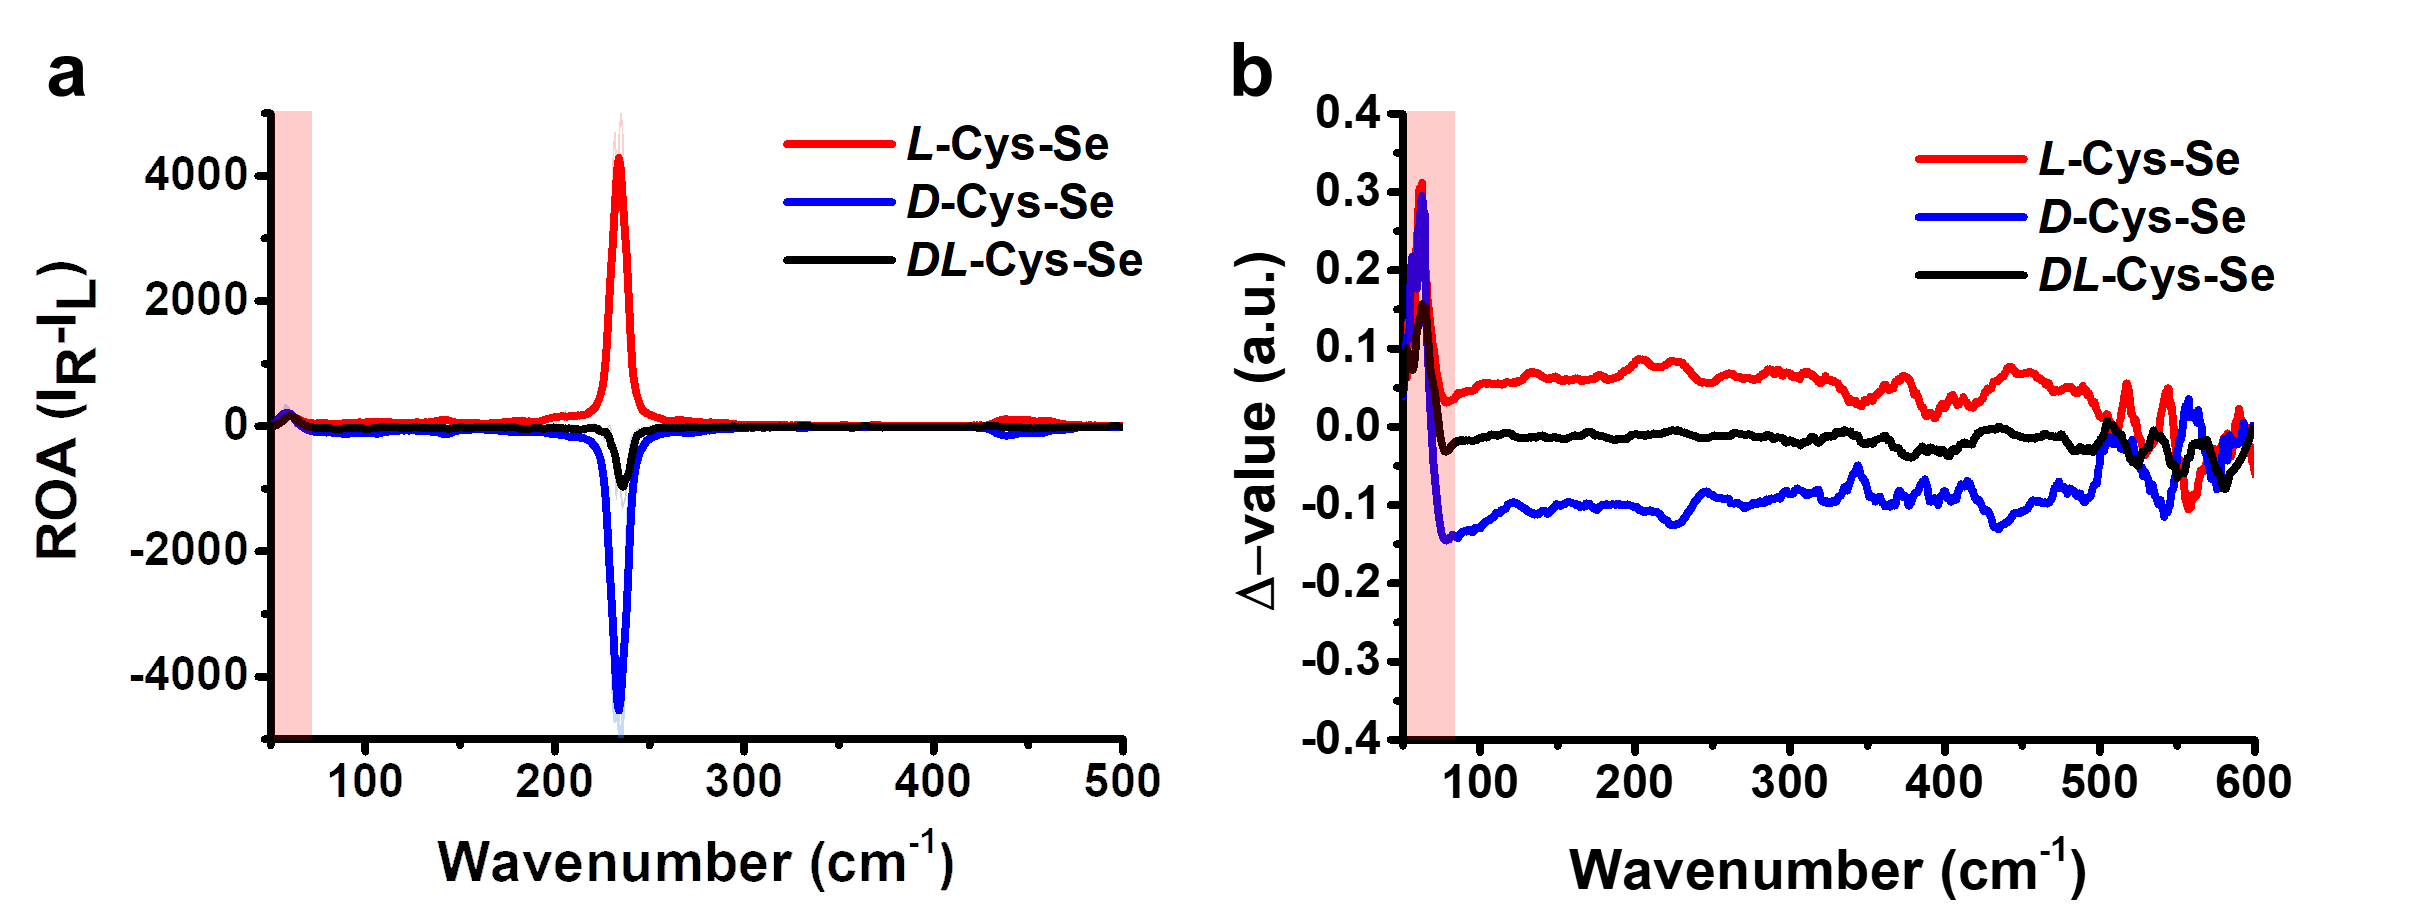
**

**Supplementary Figure 3. ICP-ROA spectra, ∆-value spectra showing consistent ICP-ROA signs from quartz substrate.** (a) ICP-ROA spectra, (b) ∆-value spectra of *L*-, *D*-, *DL*-Cys-Se NRs film.

**
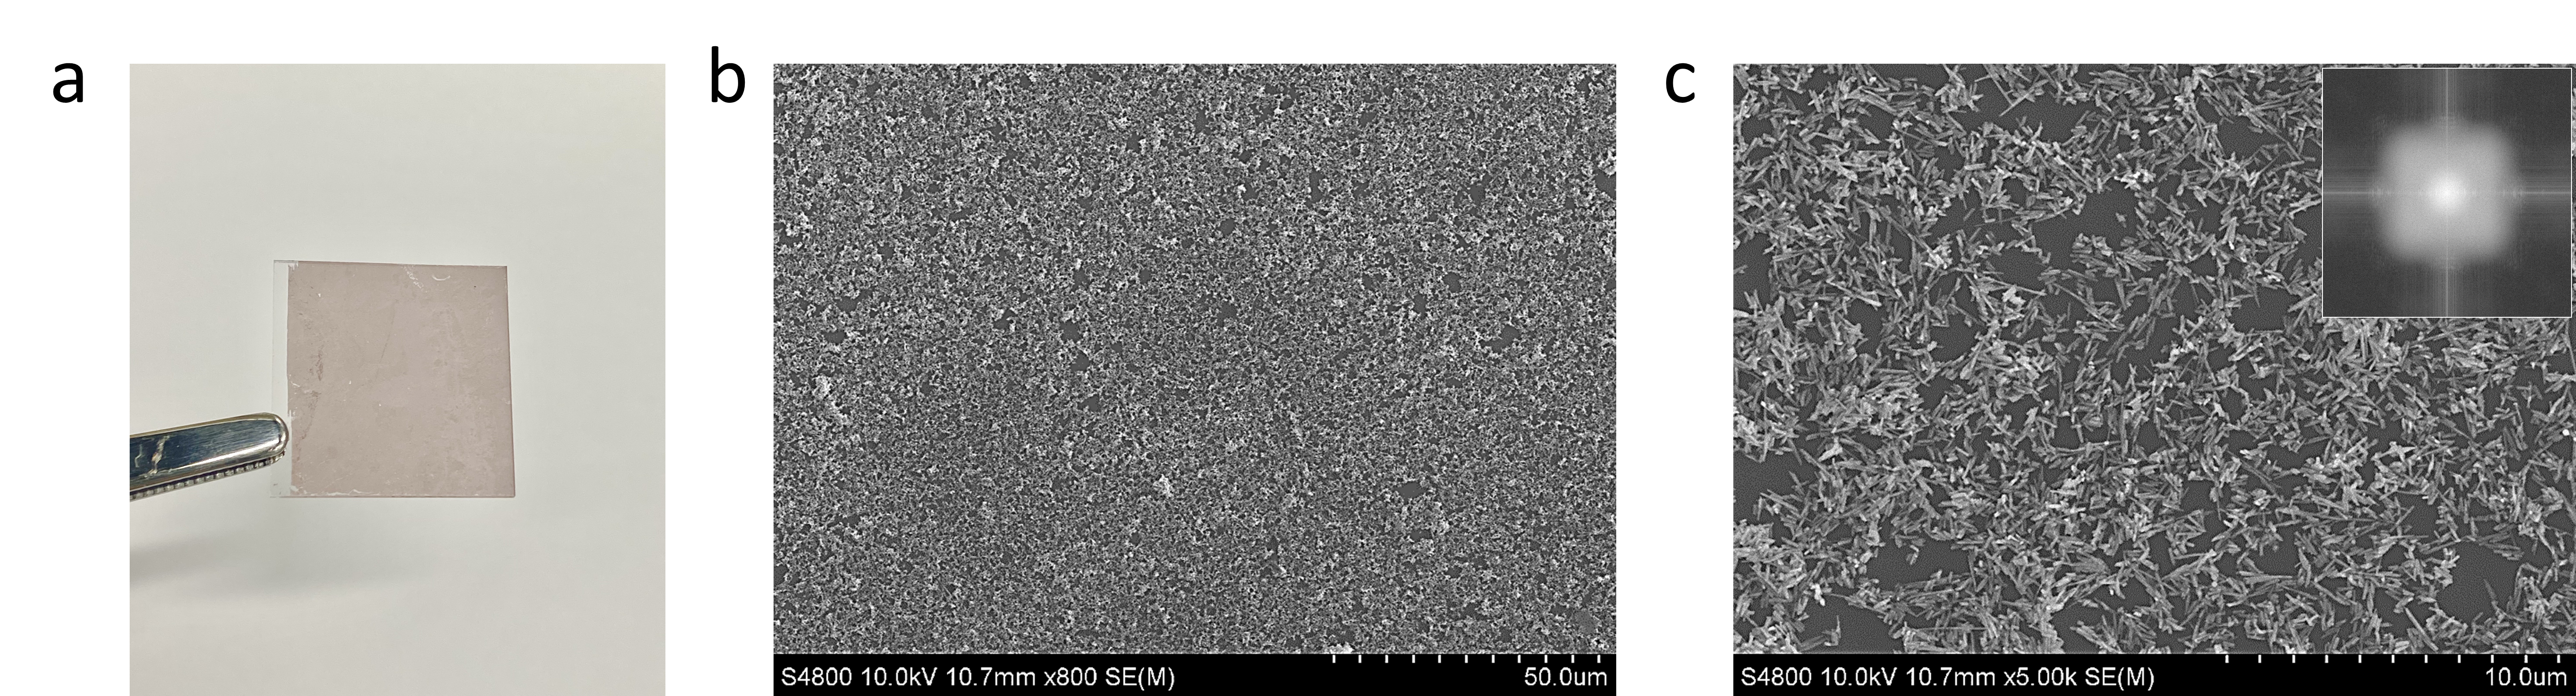
**

**Supplementary Figure 4. *L*-Cys-Se NRs monolayer.** (a)Digital photo and (b-c) SEM images of *L*-Cys-Se NRs monolayer on quartz substrate (20 × 20 mm).(inset) Fast Fourier Transform (FFT) image

**
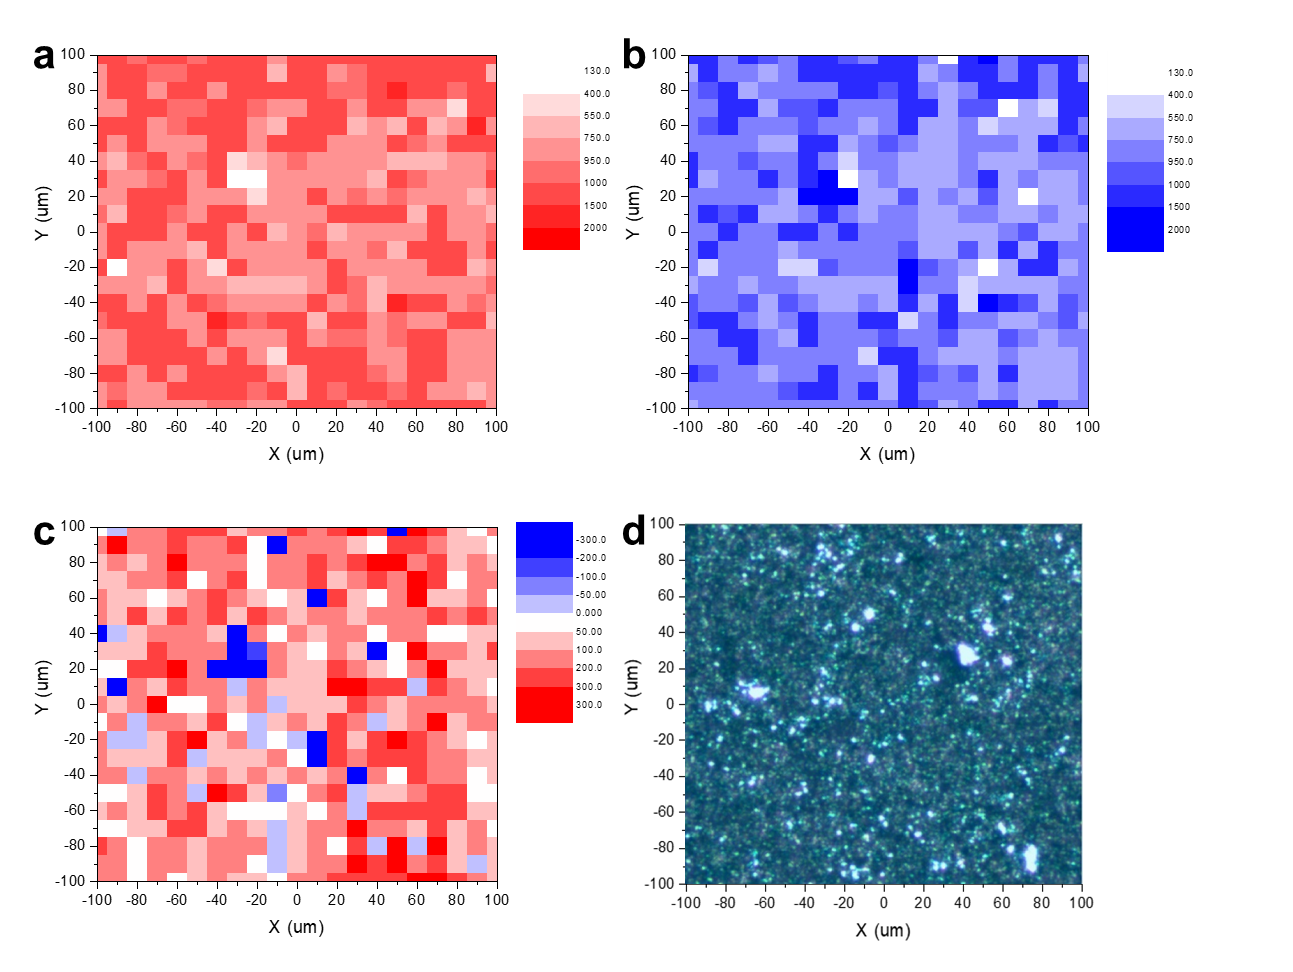
**

**Supplementary Figure 5. 2D ROA mapping of a fully covered *L*-Cys-Se NRs monolayer.** (a) 2D Raman mapping under RCP incident light, (b) 2D Raman mapping under LCP incident light, (c) 2D ROA mapping, (d) microscopic image of *L*-Cys-Se NRs monolayer.

**
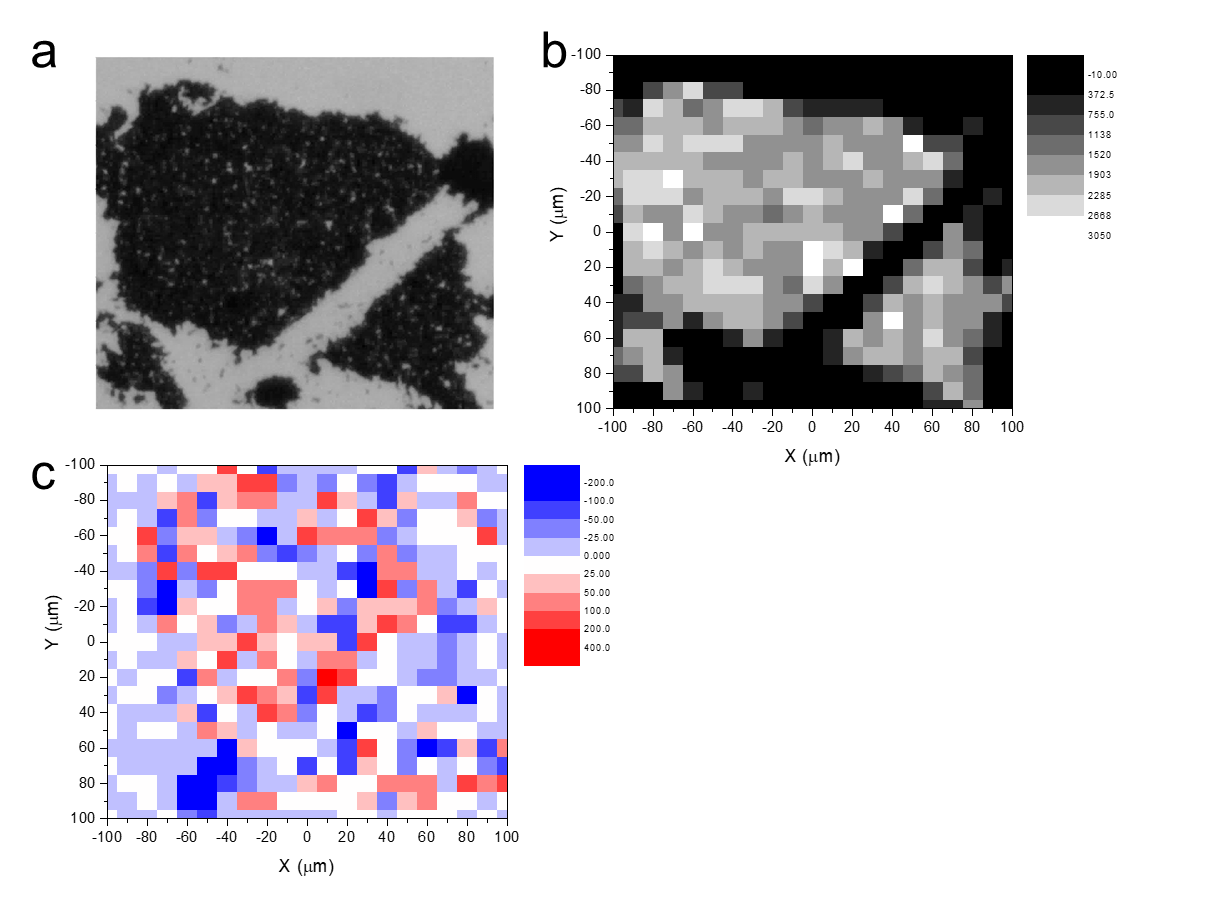
**

**Supplementary Figure 6. 2D ROA mapping of *DL*-Cys-Se NRs monolayer.**

**
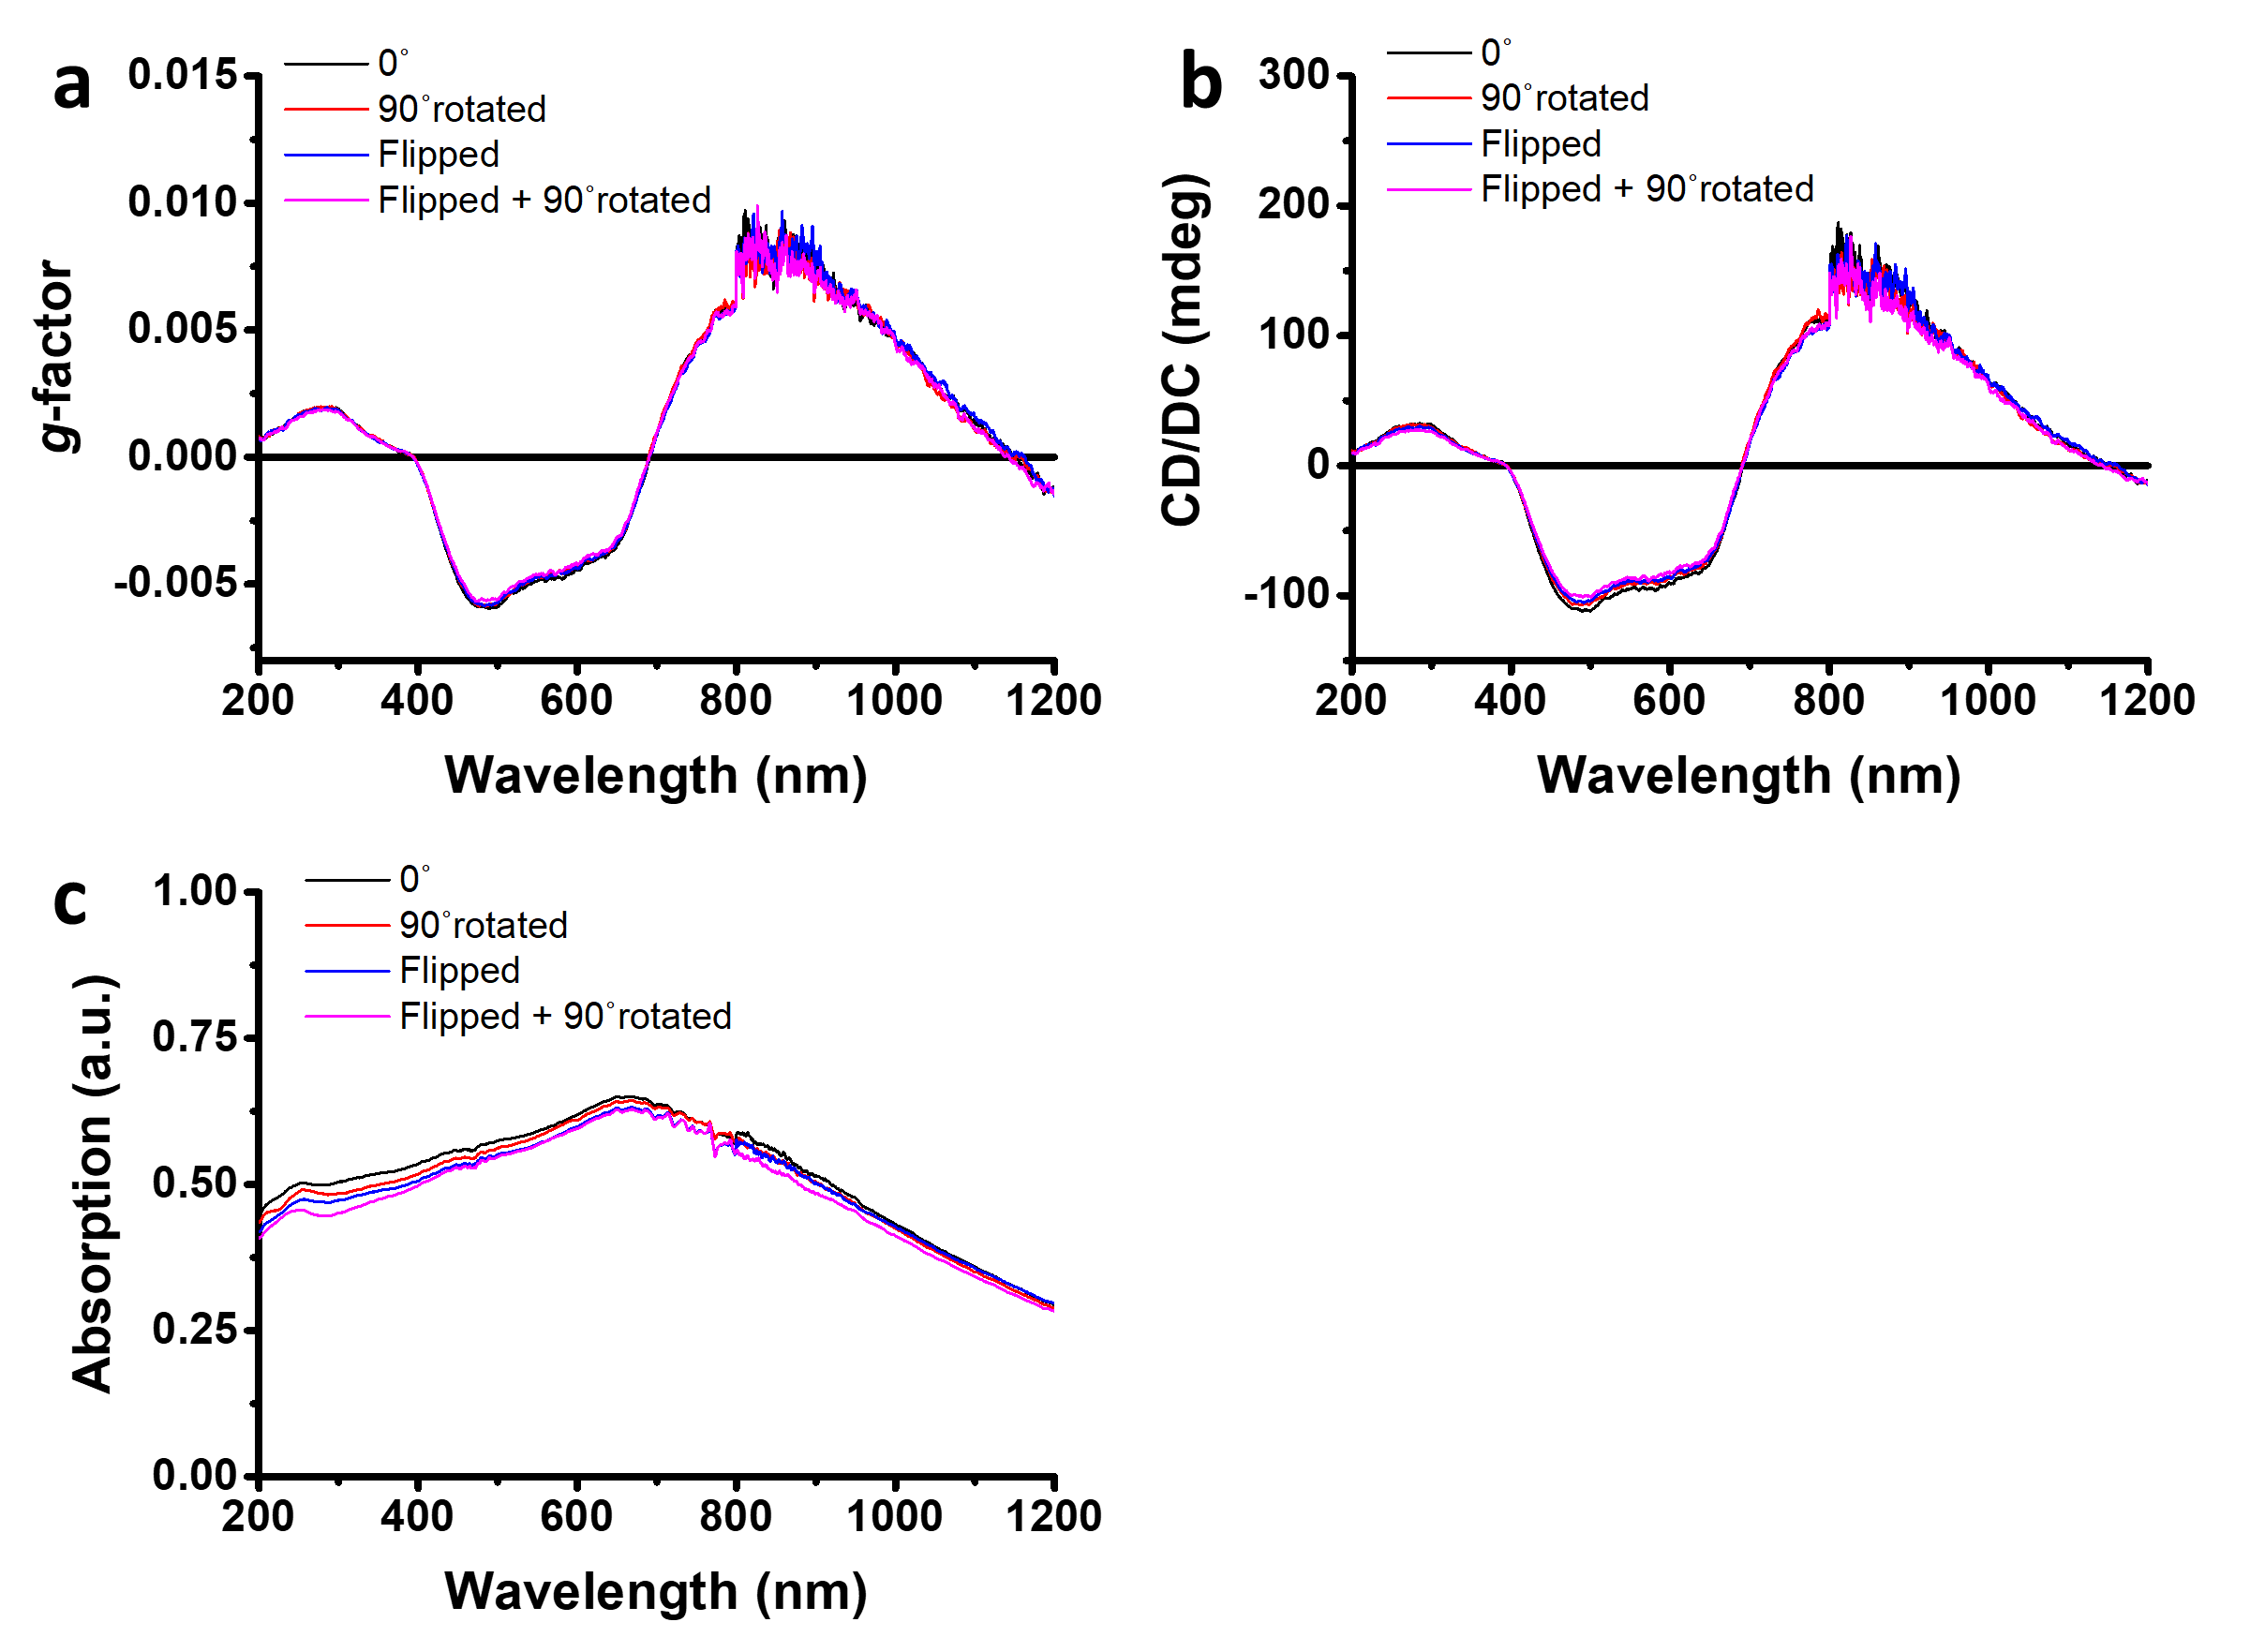
**

**Supplementary Figure 7. CD spectra of *L*-Cys-Se NR film with sample of 0°, 90° rotated, incident light in opposite side (flipped) and 90° rotated (flipped + 90° rotated).** These spectra were taken after 1 year placement in ambient condition in the form of monolayered film.

**
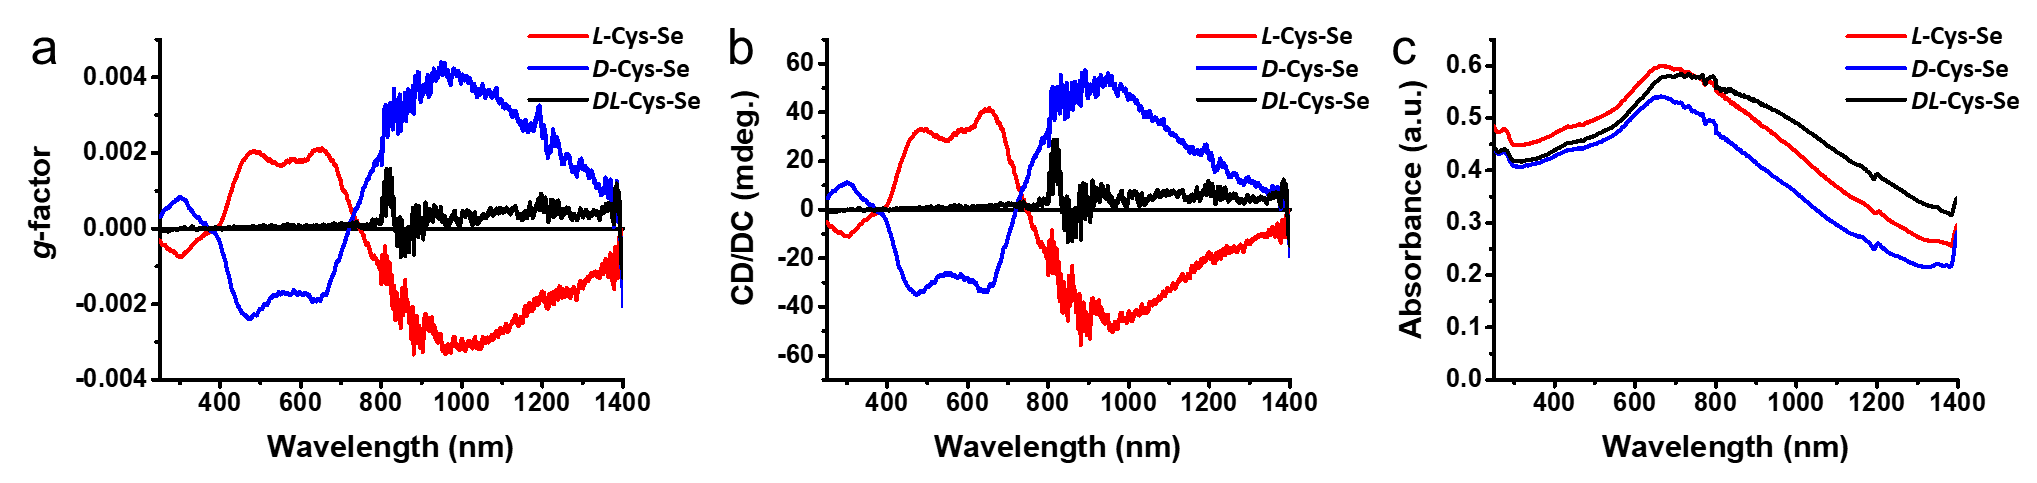
**

**Supplementary Figure 8. (a) *g*-factor spectra, (b) CD spectra, and (c) absorbance spectra of *L*-, *D*-, *DL*-Cys-Se NRs dispersed in ethanol.**

**
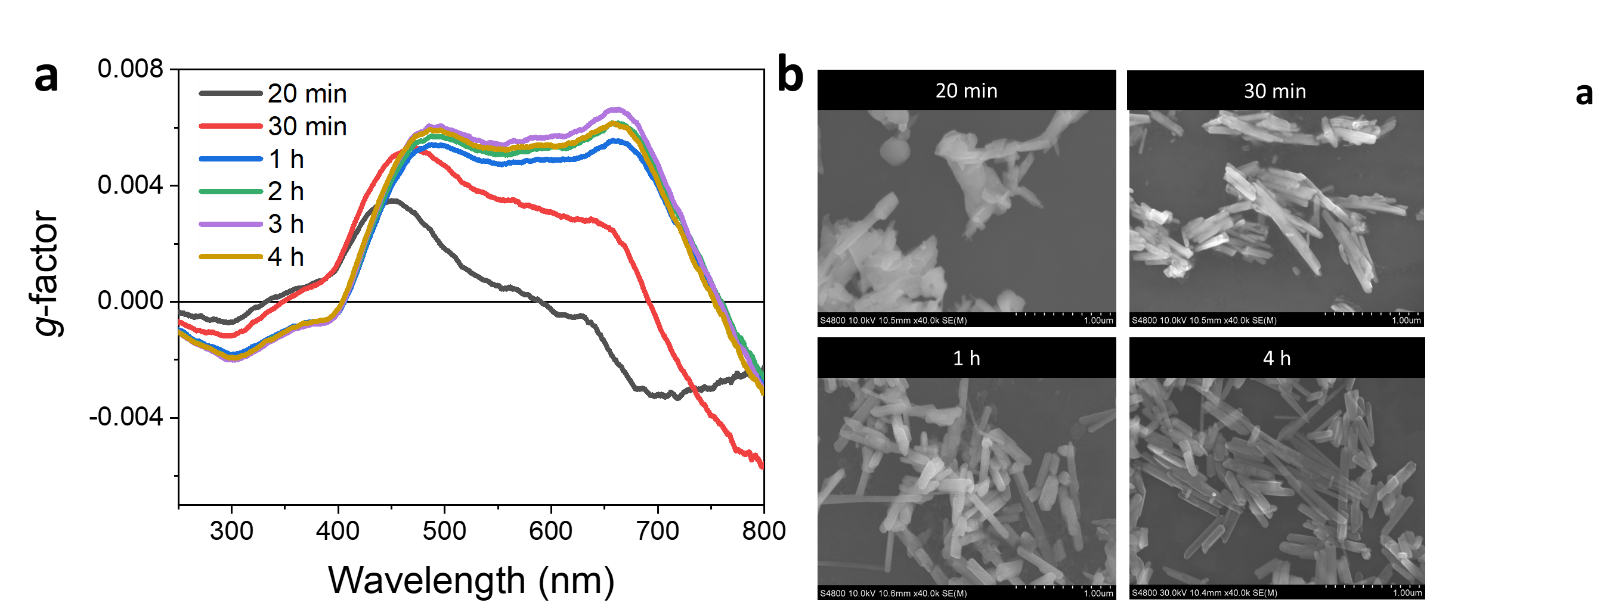
**

**Supplementary Figure 9. Reaction time-dependent *g*-factor and morphology of Se NRs.** (a) *g*-factor spectra and (b) SEM images of Se NRs at different reaction time.

**~~
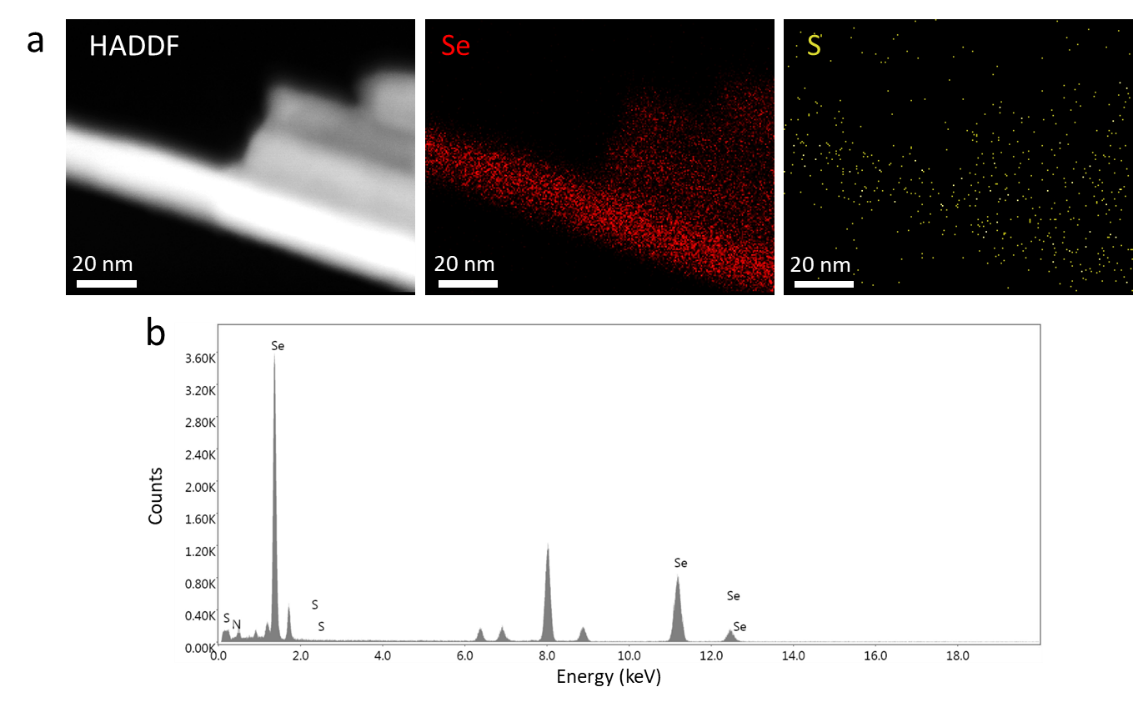
~~ Supplementary Figure 10. Element analysis of L-Cys-Se using TEM.** (a) HADDF-STEM and EDS elemental mapping images (Se and S), (b) area EDS spectrum Cys-Se NRs.


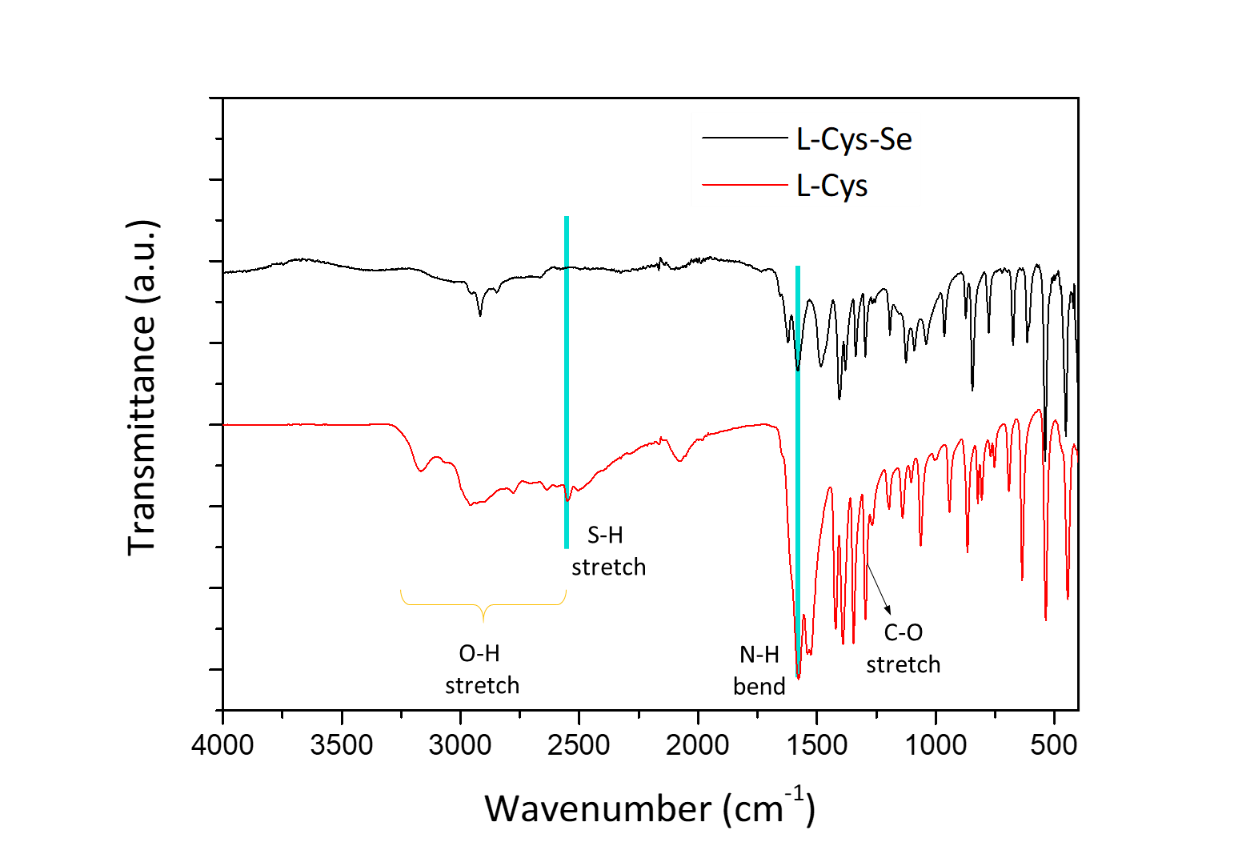


**Supplementary Figure 11. FT-IR spectra of *L*-Cys and *L*-Cys-Se NRs.**
